# Supplementary material for: Fast-response supercapacitors with graphitic ordered mesoporous carbons and carbon nanotubes for AC line filtering
Source: Royal Society of Chemistry journal article supplement (doi:10.1039/c6ta00921b), 2016-01-01
Supplement: c6ta00921b1.pdf [file c6ta00921b1.pdf]

## Supporting Information

### Fast-Response Supercapacitor with Graphitic Ordered Mesoporous Carbons and Carbon Nanotubes for AC Line Filtering

Yongju Yoo,<sup>a</sup> Min-Seop Kim,<sup>a</sup> Jong-Kook Kim,<sup>b</sup> Yong Sin Kim<sup>b</sup> and Woong Kim<sup>\*a</sup>

**Figure S1.** Small-angle XRD pattern of the mesoporous CMK-3 powder.

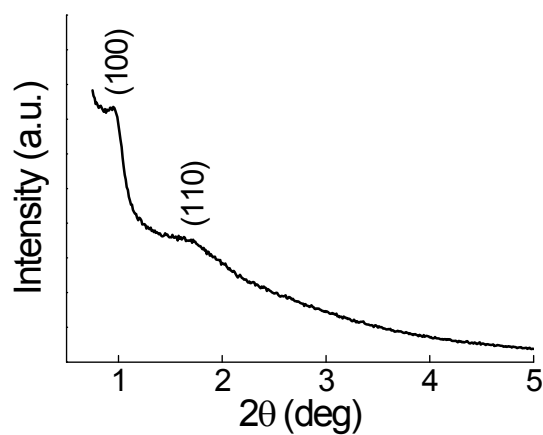

**Figure S2.** (a) Isotherm adsorption and desorption curve of the CMK-3 powder. (b) BJH-pore size distribution.

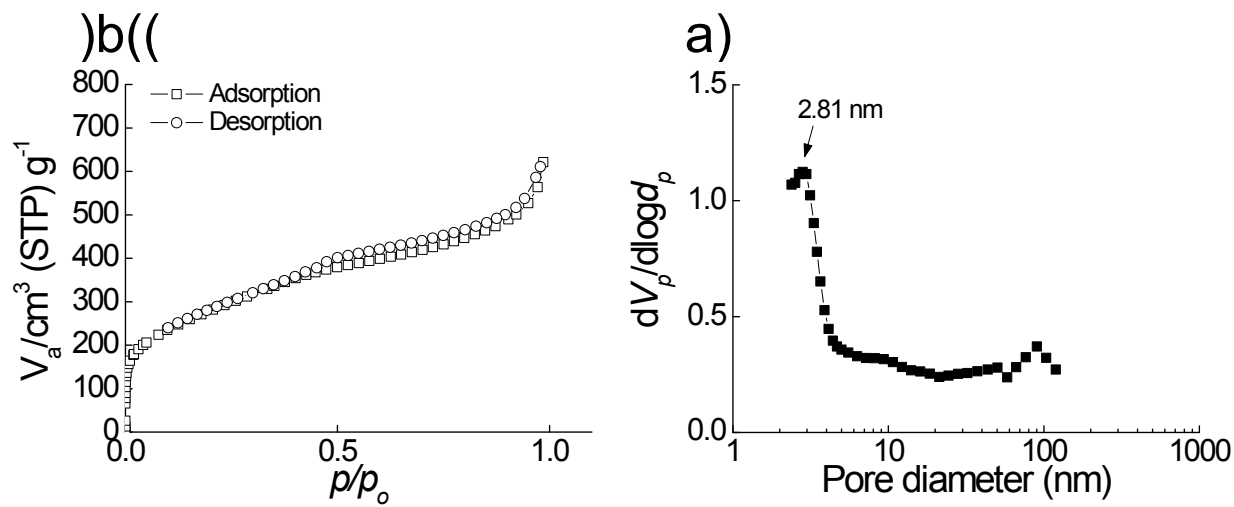

**Table S1.** Analysis of the XPS C1s peaks.

|                                     | C=C   | C-C   | C-OH   | C=O    | COOH   |
|-------------------------------------|-------|-------|--------|--------|--------|
| Assigned peak (eV)                  | 284.3 | 285.2 | 286.39 | 287.52 | 288.04 |
| Proportion of functional groups (%) | 40.46 | 24.21 | 3.88   | 9.48   | 21.97  |

**Table S2.** Performance comparison of various supercapacitors and a commercial aluminum electrolytic capacitor (AEC).

| Electrode material  | $\tau_{RC}$ at 120 Hz [ $\mu$ s] | $\phi$ at 120 Hz [ $^\circ$ ] | $C_{\text{areal}}$ at 120 Hz [ $\mu$ F/cm <sup>2</sup> ] | Voltage window [V] | $E_{\text{vol}}$ [ $\mu$ Wh/cc] | Replaceable voltage range [V] | Ref.      |
|---------------------|----------------------------------|-------------------------------|----------------------------------------------------------|--------------------|---------------------------------|-------------------------------|-----------|
| CMK-3/CNT           | 228                              | 80.3                          | 559                                                      | 2.5                | 43.5                            | 41                            | This work |
| SWCNT               | 181                              | 82.2                          | 282                                                      | 2.5                | 22.1                            | 21                            | [14]      |
| SWCNT               | 199                              | 81                            | 601                                                      | 0.8                | 4.8                             | 4.6                           | [13]      |
| VOGN                | 205                              | 82                            | 360                                                      | 0.9                | 3.6                             | 3.4                           | [6]       |
| VOGN                | N/A                              | 85                            | 265                                                      | 1 <sup>a)</sup>    | 3.2                             | 3.0                           | [5]       |
| G/CNT <sup>b)</sup> | 195                              | 81.5                          | 230                                                      | 1                  | 2.5                             | 2.3                           | [3]       |
| ErGO                | 1350                             | 84                            | 283                                                      | 0.8                | 1.7                             | 1.6                           | [2]       |
| VOGN                | 251                              | 85                            | 95.2                                                     | 1 <sup>a)</sup>    | 1.2                             | 1.1                           | [4]       |
| VOGN                | 200                              | 82                            | 87.5                                                     | 1 <sup>a)</sup>    | 1.1                             | 1.0                           | [1]       |
| AEC                 | 195                              | 81.9                          | 39.2                                                     | 10                 | 10.4                            | -                             | [14]      |

SWCNT: single-walled carbon nanotube; VOGN: vertically oriented graphene nanosheet; G/CNT: graphene/carbon nanotube carpet; ErGO: electrochemically reduced graphene oxide; AEC: aluminum electrolytic capacitor. <sup>a)</sup> The voltage window was assumed to be 1 V because an aqueous electrolyte was used. <sup>b)</sup> Microsupercapacitor.

## Equations

$$C_{areal} = \frac{I}{\frac{dV}{dt} \times \text{area of a supercapacitor cell}}$$

$I$  is the discharge current and  $dV/dt$  is the discharge slope after the IR drop.

$$\tau_{RC} = R_{120 \text{ Hz}} \times C_{120 \text{ Hz}}$$

$\tau_{RC}$  is the RC time constant.  $R_{120 \text{ Hz}}$  and  $C_{120 \text{ Hz}}$  are the resistance and capacitance at 120 Hz, respectively.

$$C'' = \frac{Z'}{2\pi f \cdot |Z|^2}$$

$C''$ ,  $f$ , and  $|Z|$  are the imaginary parts of the capacitance, frequency, and magnitude of impedance, respectively.

$$C_{areal} = \frac{-1}{2\pi f S Z''}$$

$S$  is the area of an electrode and  $Z''$  is the imaginary part of the impedance.

$$\begin{aligned} C_{vol} &= \frac{C_{areal} \text{ at } 120 \text{ Hz}}{\text{Total thickness of a supercapacitor cell}} \\ &= \frac{C \text{ at } 120 \text{ Hz}}{\text{Total volume of a supercapacitor cell}} \end{aligned}$$
